# Supplementary material for: Djebelemur, a Tiny Pre-Tooth-Combed Primate from the Eocene of Tunisia: A Glimpse into the Origin of Crown Strepsirhines
Source: PLoS One. 2013 Dec 4;8(12):e80778. doi: 10.1371/journal.pone.0080778 (PMC3851781; doi:10.1371/journal.pone.0080778)
Supplement: Dataset S5 — Matrix for the Linear Discriminant Analysis (LDA). *Major component of the diet. The body masses are from Smith and Jungers [77]. Microwear variables: Ns, Number of scratches; Np, Number of pits; Ls, Length of scratches; Nws, Number of wide scratches; Nlp, Number of large pits. Institution abbreviations: MNHN, “Muséum National d’Histoire Naturelle, Paris”; AIM, Anthropological Institute and Museum, Zürich; ONM, “Office National des Mines”, Tunis. (XLSX) [file pone.0080778.s005.xlsx]

## Sheet: Sheet1
Dataset S5
Matrix for the Linear Discriminant Analysis (LDA).
Taxon	Collection	catalogue number	Family	Dietary category*	Ns	Ls	Np	Nws	Nlp	SQ	Body mass (g)
Lepilemur ruficaudatus	MNHN	1891	Lepilemuridae	Leaf-eating	32	67.4	29	0	0	2.6	801
Lepilemur ruficaudatus	MNHN	1912-26	Lepilemuridae	Leaf-eating	33	68.6	27	0	0	0.3	801
Lepilemur ruficaudatus	MNHN	1958-740	Lepilemuridae	Leaf-eating	30	79.6	28	0	0	NA	801
Lepilemur ruficaudatus	MNHN	1958-740	Lepilemuridae	Leaf-eating	30	57.4	40	0	1	3.4	801
Lepilemur ruficaudatus	MNHN	1958-741	Lepilemuridae	Leaf-eating	38	47.5	23	1	2	4.9	801
Lepilemur ruficaudatus	MNHN	1962-2727	Lepilemuridae	Leaf-eating	37	71.3	33	0	3	2.7	801
Lepilemur ruficaudatus	MNHN	1962-2727	Lepilemuridae	Leaf-eating	31	81.3	18	0	2	3.1	801
Lepilemur ruficaudatus	MNHN	1962-2736	Lepilemuridae	Leaf-eating	38	71.4	24	0	0	-1.6	801
Lepilemur ruficaudatus	MNHN	1962-71	Lepilemuridae	Leaf-eating	33	71.9	21	0	1	2.1	801
Lepilemur ruficaudatus	MNHN	1962-74	Lepilemuridae	Leaf-eating	33	90.6	23	0	0	2.8	801
Lepilemur ruficaudatus	MNHN	1962-77	Lepilemuridae	Leaf-eating	34	68.5	27	1	0	4.6	801
Lepilemur ruficaudatus	MNHN	2002-38	Lepilemuridae	Leaf-eating	27	98	17	2	3	3	801
Lepilemur ruficaudatus	MNHN	2002-39	Lepilemuridae	Leaf-eating	32	70.9	24	0	0	2.7	801
Lepilemur ruficaudatus	MNHN	2002-93	Lepilemuridae	Leaf-eating	37	78.9	25	0	1	-1.6	801
Lepilemur ruficaudatus	MNHN	220-36	Lepilemuridae	Leaf-eating	29	65	19	0	0	0.9	801
Lepilemur ruficaudatus	MNHN	1962-2725	Lepilemuridae	Leaf-eating	30	76.5	26	1	0	NA	801
Lepilemur ruficaudatus	MNHN	1962-2699	Lepilemuridae	Leaf-eating	26	86.5	18	1	0	5.4	801
Propithecus verreauxi	MNHN	10606	Indridae	Leaf-eating	27	96.1	18	0	0	6.2	3800
Propithecus verreauxi	MNHN	10606	Indriidae	Leaf-eating	35	58.2	18	0	0	5.2	3800
Propithecus verreauxi	MNHN	10607	Indriidae	Leaf-eating	32	111.3	22	0	0	5	3800
Propithecus verreauxi	MNHN	12541	Indriidae	Leaf-eating	29	92.4	19	0	0	3.6	3800
Propithecus verreauxi	MNHN	12621	Indriidae	Leaf-eating	36	66.3	19	0	0	6.8	3800
Propithecus verreauxi	MNHN	12621	Indriidae	Leaf-eating	40	74.2	24	0	0	5.2	3800
Propithecus verreauxi	MNHN	5068	Indriidae	Leaf-eating	41	102.1	20	0	0	4	3800
Propithecus verreauxi	AIM	7255	Indriidae	Leaf-eating	35	105.3	24	0	0	7.1	3800
Propithecus verreauxi	AIM	AS1819	Indriidae	Leaf-eating	36	88	20	0	0	NA	3800
Propithecus verreauxi	AIM	5068	Indriidae	Leaf-eating	34	101.1	21	1	0	5.2	3800
Propithecus verreauxi	AIM	12621	Indriidae	Leaf-eating	35	98.5	17	0	0	4.7	3800
Propithecus verreauxi	AIM	10597	Indriidae	Leaf-eating	32	89.6	22	0	0	6.5	3800
Propithecus verreauxi	AIM	10607	Indriidae	Leaf-eating	27	73.3	23	0	1	8	3800
Propithecus verreauxi	MNHN	12541	Indriidae	Leaf-eating	29	117.1	17	0	0	4.6	3800
Propithecus verreauxi	MNHN	10606	Indriidae	Leaf-eating	37	81.2	19	0	0	3.9	3800
Hapalemur griseus	MNHN	1880-2510	Lemuridae	Leaf-eating	29	92	19	0	0	19.6	710
Hapalemur griseus	MNHN	1880-2511	Lemuridae	Leaf-eating	36	66	19	0	0	17.5	710
Hapalemur griseus	MNHN	1880-2512	Lemuridae	Leaf-eating	35	74	15	0	0	18.8	710
Hapalemur griseus	MNHN	1909-289	Lemuridae	Leaf-eating	33	102	17	0	0	18.5	710
Hapalemur griseus	MNHN	2004-276	Lemuridae	Leaf-eating	35	105	21	0	0	NA	710
Microcebus murinus	MNHN	4658	Cheirogaleidae	Fruit-eating	36	75.4	48	0	2	NA	59.9
Microcebus murinus	MNHN	4689	Cheirogaleidae	Fruit-eating	45	59	46	1	0	-6.3	59.9
Microcebus murinus	MNHN	1912-16A	Cheirogaleidae	Fruit-eating	49	48.8	52	2	0	-5.2	59.9
Microcebus murinus	MNHN	1912-16A	Cheirogaleidae	Fruit-eating	44	49.5	48	1	1	-5	59.9
Microcebus murinus	MNHN	1953-459	Cheirogaleidae	Fruit-eating	44	65.6	54	2	1	-7	59.9
Microcebus murinus	MNHN	1953-459	Cheirogaleidae	Fruit-eating	44	47.1	56	0	1	-7.9	59.9
Microcebus murinus	MNHN	2001-2104	Cheirogaleidae	Fruit-eating	40	45.2	48	1	5	-6.5	59.9
Microcebus murinus	MNHN	1911-1408	Cheirogaleidae	Fruit-eating	33	51.2	39	2	3	NA	59.9
Microcebus murinus	MNHN	1911-1408	Cheirogaleidae	Fruit-eating	38	72.1	45	3	5	-4.2	59.9
Microcebus murinus	MNHN	4078	Cheirogaleidae	Fruit-eating	38	90.5	50	2	5	-3.8	59.9
Microcebus murinus	MNHN	1911-17	Cheirogaleidae	Fruit-eating	37	65.1	44	1	3	-5.6	59.9
Microcebus murinus	MNHN	4566	Cheirogaleidae	Fruit-eating	32	56.8	38	2	3	-6.2	59.9
Microcebus murinus	MNHN	4566	Cheirogaleidae	Fruit-eating	32	50.6	39	2	3	-4.4	59.9
Microcebus murinus	MNHN	1932-3374	Cheirogaleidae	Fruit-eating	32	79.2	37	1	4	-5	59.9
Microcebus murinus	MNHN	1932-3375	Cheirogaleidae	Fruit-eating	33	59.7	43	2	4	-6.3	59.9
Microcebus murinus	MNHN	1932-3376	Cheirogaleidae	Fruit-eating	33	65.4	41	0	3	-3.7	59.9
Microcebus murinus	MNHN	1932-3379	Cheirogaleidae	Fruit-eating	34	58.7	36	0	4	-1.7	59.9
Microcebus murinus	MNHN	1932-3379	Cheirogaleidae	Fruit-eating	38	49.3	35	1	3	-3.6	59.9
Microcebus murinus	MNHN	1991-702	Cheirogaleidae	Fruit-eating	37	61.1	40	1	3	-4	59.9
Microcebus murinus	MNHN	1994-283	Cheirogaleidae	Fruit-eating	33	62.6	42	2	3	-9.2	59.9
Cheirogaleus major	MNHN	1932-3363	Cheirogaleidae	Fruit-eating	22	70.1	41	2	1	NA	395
Cheirogaleus major	MNHN	1962-2731	Cheirogaleidae	Fruit-eating	21	64.8	42	2	0	-21.5	395
Cheirogaleus major	MNHN	1962-2731	Cheirogaleidae	Fruit-eating	19	63.5	33	1	2	-20.4	395
Cheirogaleus major	MNHN	1962-2731	Cheirogaleidae	Fruit-eating	21	63.1	39	1	2	-14.1	395
Cheirogaleus major	MNHN	1962-2731	Cheirogaleidae	Fruit-eating	22	60.1	35	1	1	-22.5	395
Cheirogaleus major	MNHN	1962-2731	Cheirogaleidae	Fruit-eating	20	57.6	40	0	2	-19.7	395
Cheirogaleus major	MNHN	1967-1655	Cheirogaleidae	Fruit-eating	21	67.3	37	1	0	NA	395
Cheirogaleus major	MNHN	2001-2105	Cheirogaleidae	Fruit-eating	19	63.8	37	2	1	-24.6	395
Cheirogaleus medius	MNHN	1912-22	Cheirogaleidae	Fruit-eating	31	54.1	40	0	3	-10.3	283
Cheirogaleus medius	MNHN	1962-2688	Cheirogaleidae	Fruit-eating	33	75.7	43	0	2	-12	283
Cheirogaleus medius	MNHN	1962-2688	Cheirogaleidae	Fruit-eating	30	72.4	39	0	3	-9.2	283
Cheirogaleus medius	MNHN	1962-2688	Cheirogaleidae	Fruit-eating	30	81.7	41	0	2	-11	283
Cheirogaleus medius	MNHN	1962-2688	Cheirogaleidae	Fruit-eating	35	83.7	40	0	2	-11.4	283
Cheirogaleus medius	MNHN	1962-2688	Cheirogaleidae	Fruit-eating	30	52.3	39	0	2	-10.5	283
Cheirogaleus medius	MNHN	1962-2688	Cheirogaleidae	Fruit-eating	32	73	41	0	2	-8.9	283
Cheirogaleus medius	MNHN	1986-432	Cheirogaleidae	Fruit-eating	32	53.2	41	0	0	-9.6	283
Cheirogaleus medius	MNHN	1986-432	Cheirogaleidae	Fruit-eating	30	102.1	43	0	2	-11	283
Cheirogaleus medius	MNHN	1986-432	Cheirogaleidae	Fruit-eating	33	70.5	40	0	0	-11.4	283
Eulemur fulvus	MNHN	10598	Lemuridae	Fruit-eating	27	75.3	22	0	0	3	2213.9
Eulemur fulvus	MNHN	10603	Lemuridae	Fruit-eating	39	72.8	24	2	1	3.9	2213.9
Eulemur fulvus	MNHN	10603	Lemuridae	Fruit-eating	39	68.4	21	0	0	4.8	2213.9
Eulemur fulvus	MNHN	10608	Lemuridae	Fruit-eating	34	67.6	22	1	0	3	2213.9
Eulemur fulvus	MNHN	1962-2775	Lemuridae	Fruit-eating	35	85.4	20	0	1	2.4	2213.9
Eulemur fulvus	MNHN	1962-2780	Lemuridae	Fruit-eating	37	81.5	17	0	0	2	2213.9
Eulemur fulvus	MNHN	1962-2783	Lemuridae	Fruit-eating	33	51.4	21	0	0	NA	2213.9
Eulemur fulvus	MNHN	1962-2786	Lemuridae	Fruit-eating	33	81.9	18	0	0	2.7	2213.9
Eulemur fulvus	MNHN	1962-2775	Lemuridae	Fruit-eating	39	56.6	24	0	0	2.9	2213.9
Eulemur fulvus	MNHN	1960-110	Lemuridae	Fruit-eating	34	77.8	21	1	1	4.5	2213.9
Eulemur fulvus	AIM	22190	Lemuridae	Fruit-eating	35	59.2	19	0	2	5.3	2213.9
Eulemur fulvus	AIM	10598	Lemuridae	Fruit-eating	36	72.5	25	1	1	4.6	2213.9
Eulemur fulvus	AIM	10598	Lemuridae	Fruit-eating	36	63.3	26	0	0	NA	2213.9
Eulemur fulvus	AIM	10603	Lemuridae	Fruit-eating	38	65.5	19	1	0	3.2	2213.9
Eulemur fulvus	AIM	10608	Lemuridae	Fruit-eating	34	78.2	27	0	0	2.9	2213.9
Daubentonia madagascarensis	MNHN	1901-841	Daubentoniidae	Fruit-eating	12	219.2	20	2	1	NA	2545
Daubentonia madagascarensis	MNHN	1962-2683	Daubentoniidae	Fruit-eating	18	108.1	29	0	0	NA	2545
Daubentonia madagascarensis	MNHN	1962-2095	Daubentoniidae	Fruit-eating	20	94.7	38	2	4	NA	2545
Daubentonia madagascarensis	MNHN	1962-2095	Daubentoniidae	Fruit-eating	17	94.5	32	3	3	NA	2545
Daubentonia madagascarensis	MNHN	1962-2094	Daubentoniidae	Fruit-eating	20	76.9	35	1	3	NA	2545
Daubentonia madagascarensis	MNHN	1962-2094	Daubentoniidae	Fruit-eating	19	89.5	30	2	2	NA	2545
Daubentonia madagascarensis	MNHN	1907-841	Daubentoniidae	Fruit-eating	23	66.4	39	2	1	NA	2545
Daubentonia madagascarensis	MNHN	1883-648	Daubentoniidae	Fruit-eating	16	107.8	38	0	4	NA	2545
Perodictitus potto	AIM	7574	Lorisidae	Fruit-eating	19	45.7	32	0	0	-24.6	1200
Perodictitus potto	AIM	7575	Lorisidae	Fruit-eating	16	56.3	31	0	2	-25.4	1200
Perodictitus potto	AIM	7601	Lorisidae	Fruit-eating	23	61.3	33	0	4	-20.2	1200
Perodictitus potto	AIM	7537	Lorisidae	Fruit-eating	18	47.2	33	1	4	-22.2	1200
Perodictitus potto	AIM	7477	Lorisidae	Fruit-eating	22	52.2	39	0	0	-18.5	1200
Perodictitus potto	AIM	7476	Lorisidae	Fruit-eating	22	67.1	38	0	1	NA	1200
Perodictitus potto	AIM	7425	Lorisidae	Fruit-eating	20	59.2	37	2	2	-19.4	1200
Perodictitus potto	AIM	7248	Lorisidae	Fruit-eating	17	55.3	41	1	3	-22.4	1200
Perodictitus potto	AIM	7414	Lorisidae	Fruit-eating	16	72.5	32	1	3	-19.3	1200
Perodictitus potto	AIM	7424	Lorisidae	Fruit-eating	19	77.4	33	0	0	-17.6	1200
Perodictitus potto	AIM	6974	Lorisidae	Fruit-eating	19	41.8	34	0	0	-20.7	1200
Perodictitus potto	AIM	6536	Lorisidae	Fruit-eating	21	48.8	38	0	0	-21.4	1200
Perodictitus potto	AIM	7029	Lorisidae	Fruit-eating	22	59.6	40	0	5	-20.9	1200
Perodictitus potto	AIM	7050	Lorisidae	Fruit-eating	20	51.4	42	0	4	NA	1200
Perodictitus potto	AIM	7014	Lorisidae	Fruit-eating	14	64.5	41	0	2	-24.8	1200
Perodictitus potto	AIM	7054	Lorisidae	Fruit-eating	21	50.4	39	2	3	-20.3	1200
Perodictitus potto	AIM	7141	Lorisidae	Fruit-eating	18	44.2	35	2	3	NA	1200
Perodictitus potto	AIM	6623	Lorisidae	Fruit-eating	19	52.3	36	1	1	-19.7	1200
Perodictitus potto	AIM	7046	Lorisidae	Fruit-eating	19	63.2	35	2	0	NA	1200
Otolemur crassicaudatus	MNHN	1905-378	Galagidae	Gum-eating	19	26.4	28	3	1	-10.7	1350
Otolemur crassicaudatus	MNHN	1897-619	Galagidae	Gum-eating	14	39.2	25	1	1	-12.7	1350
Otolemur crassicaudatus	MNHN	1911-679	Galagidae	Gum-eating	23	31.4	26	2	3	-9.4	1350
Otolemur crassicaudatus	MNHN	1962-980	Galagidae	Gum-eating	24	33.7	27	2	0	-10.7	1350
Otolemur crassicaudatus	MNHN	1911-681	Galagidae	Gum-eating	14	36.6	24	1	3	-11.4	1350
Otolemur crassicaudatus	MNHN	1962-979	Galagidae	Gum-eating	17	27.2	26	1	4	-13.7	1350
Otolemur crassicaudatus	MNHN	1911-680	Galagidae	Gum-eating	19	61.3	29	4	2	-12.7	1350
Otolemur crassicaudatus	MNHN	A-3014	Galagidae	Gum-eating	22	39.7	30	3	2	-11	1350
Euoticus elegantulus	AIM	7729	Galagidae	Gum-eating	20	35.9	42	1	2	-3.6	300
Euoticus elegantulus	AIM	7762	Galagidae	Gum-eating	14	34.5	27	2	3	-2.7	300
Euoticus elegantulus	AIM	7795	Galagidae	Gum-eating	19	20.2	30	1	4	1.4	300
Euoticus elegantulus	AIM	7712	Galagidae	Gum-eating	23	56.5	36	4	2	0.6	300
Euoticus elegantulus	AIM	7699	Galagidae	Gum-eating	19	31.4	27	3	2	-2.7	300
Euoticus elegantulus	AIM	7687	Galagidae	Gum-eating	27	20.5	28	5	2	-0.8	300
Euoticus elegantulus	AIM	7679	Galagidae	Gum-eating	21	45.4	31	0	1	-0.4	300
Euoticus elegantulus	AIM	7672	Galagidae	Gum-eating	15	41.7	32	0	3	-1.6	300
Euoticus elegantulus	AIM	7671	Galagidae	Gum-eating	14	45.7	29	4	2	2.4	300
Euoticus elegantulus	AIM	7624	Galagidae	Gum-eating	13	39.7	41	4	2	2.7	300
Euoticus elegantulus	AIM	7032	Galagidae	Gum-eating	18	38.8	29	3	1	-3.2	300
Euoticus elegantulus	AIM	7663	Galagidae	Gum-eating	11	36.9	27	1	1	-3	300
Euoticus elegantulus	AIM	7625	Galagidae	Gum-eating	21	29.9	25	2	3	NA	300
Euoticus elegantulus	AIM	7628	Galagidae	Gum-eating	26	30.9	27	2	0	2.4	300
Euoticus elegantulus	AIM	7655	Galagidae	Gum-eating	11	35.3	25	1	3	1.7	300
Euoticus elegantulus	AIM	7656	Galagidae	Gum-eating	15	26.6	29	1	4	-1.7	300
Euoticus elegantulus	AIM	7657	Galagidae	Gum-eating	20	60.4	34	4	2	0.6	300
Euoticus elegantulus	AIM	7658	Galagidae	Gum-eating	18	39.2	29	3	2	-2.7	300
Euoticus elegantulus	AIM	7659	Galagidae	Gum-eating	25	45.3	28	5	2	-3.9	300
Euoticus elegantulus	AIM	7660	Galagidae	Gum-eating	17	51	30	0	3	-1.6	300
Euoticus elegantulus	AIM	7661	Galagidae	Gum-eating	15	46.3	27	4	2	-4.6	300
Arctocebus calabarensis	AIM	7761	Lorisidae	Insect-eating	25	67.2	34	1	0	12.4	310
Arctocebus calabarensis	AIM	7760	Lorisidae	Insect-eating	30	90	35	5	5	NA	310
Arctocebus calabarensis	AIM	7703	Lorisidae	Insect-eating	31	77.3	29	6	3	14.3	310
Arctocebus calabarensis	AIM	7686	Lorisidae	Insect-eating	29	71.7	37	2	5	11	310
Arctocebus calabarensis	AIM	7710	Lorisidae	Insect-eating	28	61.4	30	4	2	12.9	310
Arctocebus calabarensis	AIM	7669	Lorisidae	Insect-eating	27	101.2	31	0	4	13.6	310
Arctocebus calabarensis	AIM	7626	Lorisidae	Insect-eating	32	59.2	28	3	3	14.3	310
Arctocebus calabarensis	AIM	7415	Lorisidae	Insect-eating	22	78.8	29	4	2	12.3	310
Arctocebus calabarensis	AIM	7416	Lorisidae	Insect-eating	36	89.7	36	4	0	12.7	310
Arctocebus calabarensis	AIM	7474	Lorisidae	Insect-eating	31	81.6	41	2	5	11.6	310
Arctocebus calabarensis	AIM	7475	Lorisidae	Insect-eating	27	80.7	40	3	3	12.7	310
Arctocebus calabarensis	AIM	7535	Lorisidae	Insect-eating	28	79.2	39	3	5	14.2	310
Arctocebus calabarensis	AIM	7609	Lorisidae	Insect-eating	31	65.6	36	3	3	14	310
Arctocebus calabarensis	AIM	7618	Lorisidae	Insect-eating	30	71.6	31	3	4	10.8	310
Arctocebus calabarensis	AIM	6985	Lorisidae	Insect-eating	29	45.4	32	1	5	11.7	310
Loris tardigradus	MNHN	A3956	Lorisidae	Insect-eating	31	91.5	28	0	2	3.6	266
Loris tardigradus	MNHN	1962-2680	Lorisidae	Insect-eating	31	69	25	1	1	2.2	266
Loris tardigradus	MNHN	A-3927	Lorisidae	Insect-eating	28	72.9	34	0	1	2.6	266
Loris tardigradus	MNHN	A-3928	Lorisidae	Insect-eating	33	60.5	35	1	2	2.7	266
Loris tardigradus	MNHN	A-3929	Lorisidae	Insect-eating	29	66	39	2	2	3.1	266
Loris tardigradus	MNHN	A-3930	Lorisidae	Insect-eating	31	66.1	35	1	2	1.6	266
Loris tardigradus	MNHN	A-3955	Lorisidae	Insect-eating	32	70.7	36	0	3	4.6	266
Loris tardigradus	MNHN	A-3957	Lorisidae	Insect-eating	34	68.5	37	1	3	5.3	266
Loris tardigradus	MNHN	A-3925	Lorisidae	Insect-eating	32	59.1	37	2	0	3	266
Galago senegalensis	MNHN	1911-682	Galagidae	Insect-eating	25	88	43	0	2	NA	215
Galago senegalensis	MNHN	1911-686	Galagidae	Insect-eating	32	91	37	2	3	16.3	215
Galago senegalensis	MNHN	NC	Galagidae	Insect-eating	31	85	35	2	1	15.2	215
Galago senegalensis	MNHN	1996-455	Galagidae	Insect-eating	26	74	28	0	2	16.8	215
Galago senegalensis	MNHN	1911-687	Galagidae	Insect-eating	28	92	25	1	3	16.2	215
Galago senegalensis	MNHN	1911-688	Galagidae	Insect-eating	33	89	31	3	4	NA	215
Galago senegalensis	MNHN	1996-454	Galagidae	Insect-eating	30	83	35	0	0	NA	215
Galago senegalensis	MNHN	1973-110	Galagidae	Insect-eating	31	78	38	0	0	NA	215
Galago senegalensis	MNHN	1973-114	Galagidae	Insect-eating	28	78	35	0	1	16.4	215
Galago senegalensis	MNHN	1973-111	Galagidae	Insect-eating	34	75	39	2	1	15.9	215
Galago senegalensis	MNHN	1995-464	Galagidae	Insect-eating	27	70	31	2	3	16.7	215
Galago senegalensis	MNHN	1995-467	Galagidae	Insect-eating	29	75	37	0	4	17	215
Galago senegalensis	MNHN	2000-1091	Galagidae	Insect-eating	32	76	35	3	3	16.5	215
Galago senegalensis	MNHN	2000-1092	Galagidae	Insect-eating	25	62	36	1	2	16.7	215
Galago senegalensis	MNHN	1962-2683	Galagidae	Insect-eating	29	65	30	1	0	17.6	215
Galago senegalensis	MNHN	1962-2684	Galagidae	Insect-eating	31	62	34	2	3	16.5	215
Galago senegalensis	MNHN	1962-2685	Galagidae	Insect-eating	25	88	43	0	2	NA	215
Tarsius spectrum	MNHN	NC	Tarsiidae	Insect-eating	29	72	37	2	5	25.6	108
Tarsius spectrum	MNHN	NC	Tarsiidae	Insect-eating	28	61	30	4	2	24.6	126
Djebelemur martinezi	ONM	CBI-1-544 & 33	Djebelemuridae	-	29	59.35	37	1	3	1.34	70
* major component of the diet
Institution abbreviations: MNHN, "Muséum National d'Histoire Naturelle, Paris"; AIM, Anthropological Institute and Museum, Zürich; ONM, "Office National des Mines", Tunis.
Microwear variables: Ns, Number of scratches; Np, Number of pits; Ls, Length of scratches; Nws, Number of wide scratches; Nlp, Number of large pits.
The body masses are from Smith and Jungers [76].
